# Supplementary material for: The synthesis of rhodium substituted ε-iron oxide exhibiting super high frequency natural resonance
Source: Royal Society of Chemistry journal article supplement (doi:10.1039/c3tc30805g), 2013-01-01
Supplement: c3tc30805g.pdf [file c3tc30805g.pdf]

# The synthesis of rhodium substituted $\epsilon$ -iron oxide exhibiting super high frequency natural resonance

Asuka Namai,<sup>a</sup> Marie Yoshikiyo,<sup>a</sup> Sayaka Umeda,<sup>a</sup> Takayuki Yoshida,<sup>b</sup> Tatsuro Miyazaki,<sup>b</sup>  
Makoto Nakajima,<sup>c</sup> Keita Yamaguchi,<sup>d</sup> Tohru Suemoto,<sup>d</sup> and Shin-ichi Ohkoshi<sup>\*ae</sup>

<sup>a</sup>*Department of Chemistry, School of Science, The University of Tokyo*  
*7-3-1 Hongo, Bunkyo-ku, Tokyo 113-0033, Japan*

<sup>b</sup>*Dowa Electronics Materials Co., Ltd.*  
*1-3-1 Kaigandori, Minami-ku, Okayama 702-8506, Japan*

<sup>c</sup>*Department of Physics, Chiba University*  
*1-33, Yayoicho, Inage Ward, Chiba-shi, Chiba 263-8522, Japan*

<sup>d</sup>*Institute for Solid State Physics, The University of Tokyo*  
*5-1-5 Kashiwanoha, Kashiwa, Chiba 277-8581, Japan*

<sup>e</sup>*CREST, JST, K's Gobancho, 7 Gobancho, Chiyoda-ku, Tokyo 102-0076, Japan*

\*Correspondence should be addressed to S. O.  
ohkoshi@chem.s.u-tokyo.ac.jp

| <b>Contents:</b>                                    |                            | <b>Page</b> |
|-----------------------------------------------------|----------------------------|-------------|
| 1. Synthesis .....                                  | Table S1                   | S2          |
| 2. Investigation of the sintering temperature ..... | Fig. S1                    | S2          |
| 3. TEM study .....                                  | Table S2<br>Fig. S2        | S3          |
| 4. Crystal structure analyses .....                 | Table S3–S7<br>Figs. S3–S7 | S4–S11      |
| 5. Magnetic properties .....                        | Figs. S8–S10               | S12–S14     |

## § 1. Synthesis

**Table S1.** Rhodium concentration in the synthesis and the observed concentration by ICP-MS measurement.

| Sample     |      | 1   | 2    | 3    | 4    | 5    | 6    | 7    | 8    | 9    |
|------------|------|-----|------|------|------|------|------|------|------|------|
| Rh/(Fe+Rh) | feed | 0.0 | 0.02 | 0.04 | 0.06 | 0.08 | 0.10 | 0.13 | 0.15 | 0.18 |
|            | obs. | 0.0 | 0.02 | 0.04 | 0.06 | 0.07 | 0.10 | 0.11 | 0.14 | 0.16 |

## § 2. Investigation of the sintering temperature

In order to investigate the appropriate sintering temperature to obtain the  $\epsilon$ -phase, we attempted various sintering temperatures in the range of 1020~1300 °C. The Rietveld analyses of XRD patterns indicated that the sample sintered at 1080 °C had a high  $\epsilon$ -phase ratio, and hence, we adopted 1080 °C as the sintering temperature.

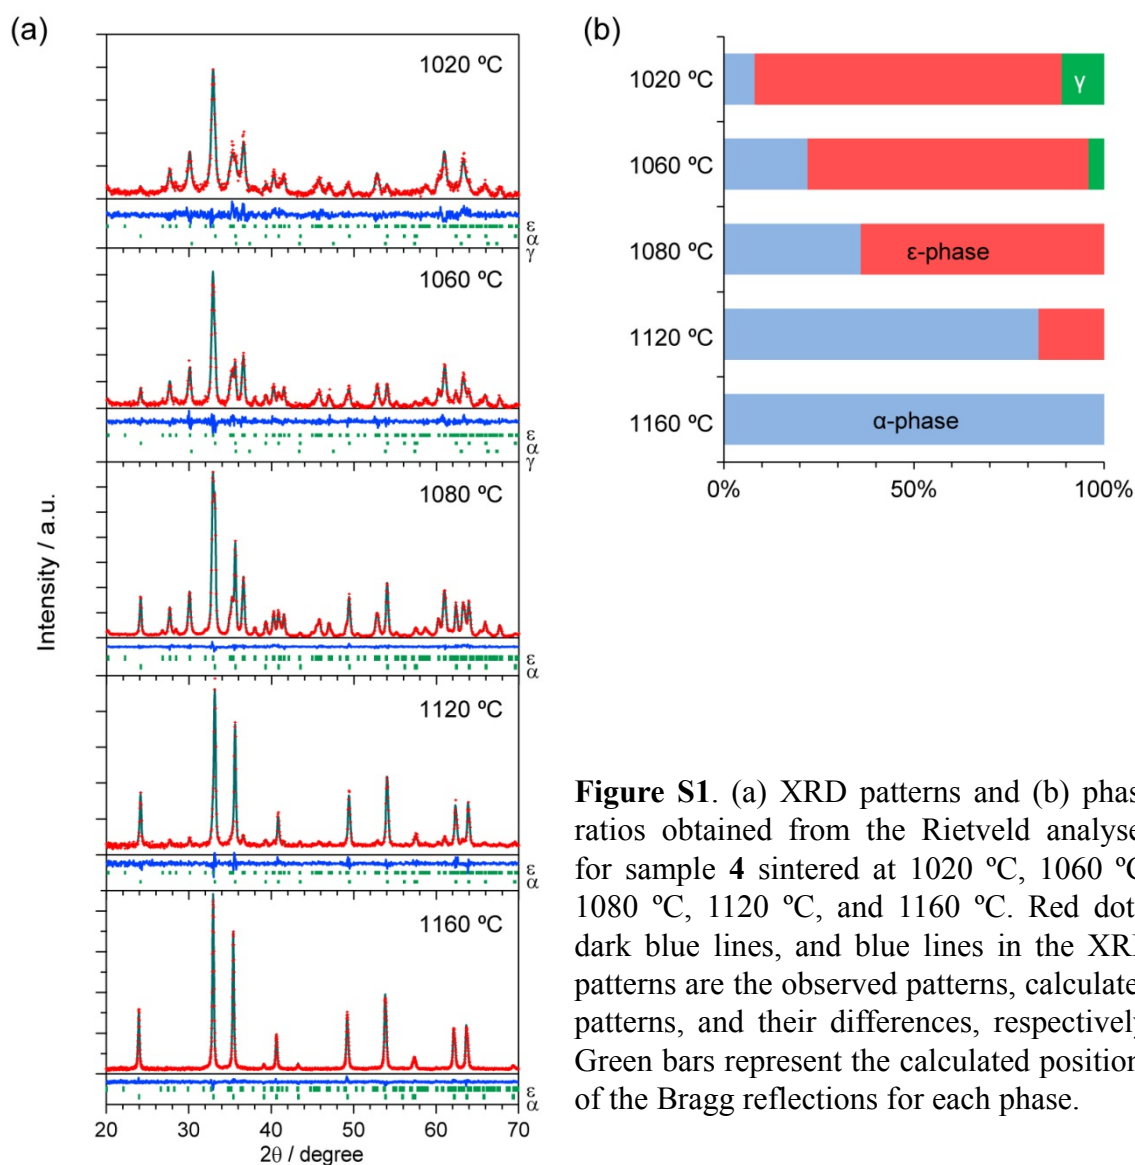

**Figure S1.** (a) XRD patterns and (b) phase ratios obtained from the Rietveld analyses for sample 4 sintered at 1020 °C, 1060 °C, 1080 °C, 1120 °C, and 1160 °C. Red dots, dark blue lines, and blue lines in the XRD patterns are the observed patterns, calculated patterns, and their differences, respectively. Green bars represent the calculated positions of the Bragg reflections for each phase.

### § 3. TEM study

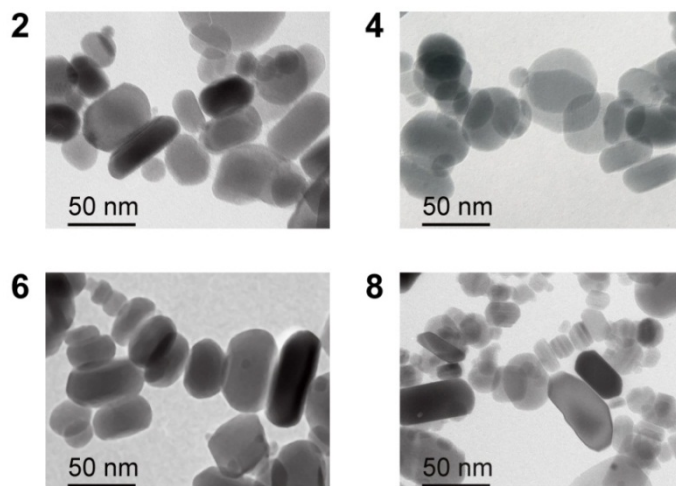

**Figure S2.** TEM images for samples **2**, **4**, **6**, and **8**.

**Table S2.** Particle size and aspect ratio of obtained from TEM images.

| Sample   | Long axis      | Short axis     | Average aspect ratio |
|----------|----------------|----------------|----------------------|
| <b>1</b> | $33 \pm 15$ nm | $24 \pm 11$ nm | 1.4                  |
| <b>2</b> | $35 \pm 16$ nm | $25 \pm 11$ nm | 1.4                  |
| <b>3</b> | $36 \pm 17$ nm | $26 \pm 12$ nm | 1.4                  |
| <b>4</b> | $35 \pm 16$ nm | $27 \pm 12$ nm | 1.3                  |
| <b>5</b> | $36 \pm 18$ nm | $27 \pm 14$ nm | 1.3                  |
| <b>6</b> | $29 \pm 17$ nm | $21 \pm 13$ nm | 1.5                  |
| <b>7</b> | $27 \pm 18$ nm | $19 \pm 12$ nm | 1.5                  |
| <b>8</b> | $23 \pm 14$ nm | $16 \pm 9$ nm  | 1.5                  |
| <b>9</b> | $22 \pm 13$ nm | $16 \pm 9$ nm  | 1.4                  |

## § 4. Crystal structure analyses

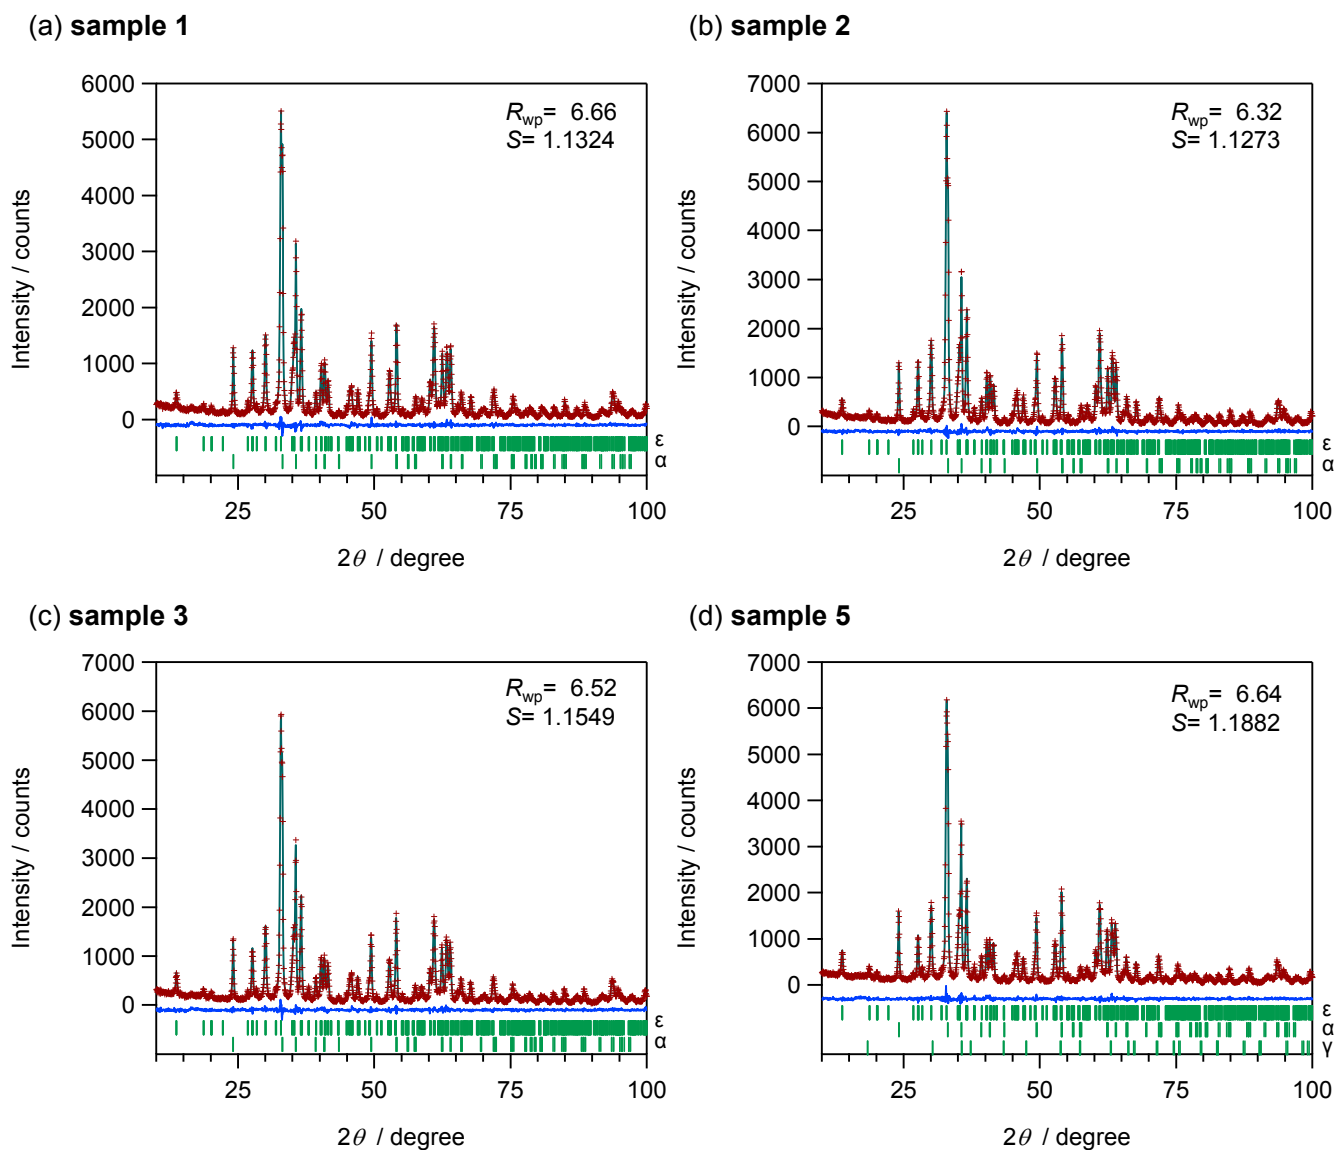

**Figure S3.** XRD patterns and Rietveld analyses for samples 1–3, 5. Red dots, dark blue lines, and blue lines are the observed patterns, calculated patterns, and their differences, respectively. Green bars represent the calculated positions of the Bragg reflections for each phase.

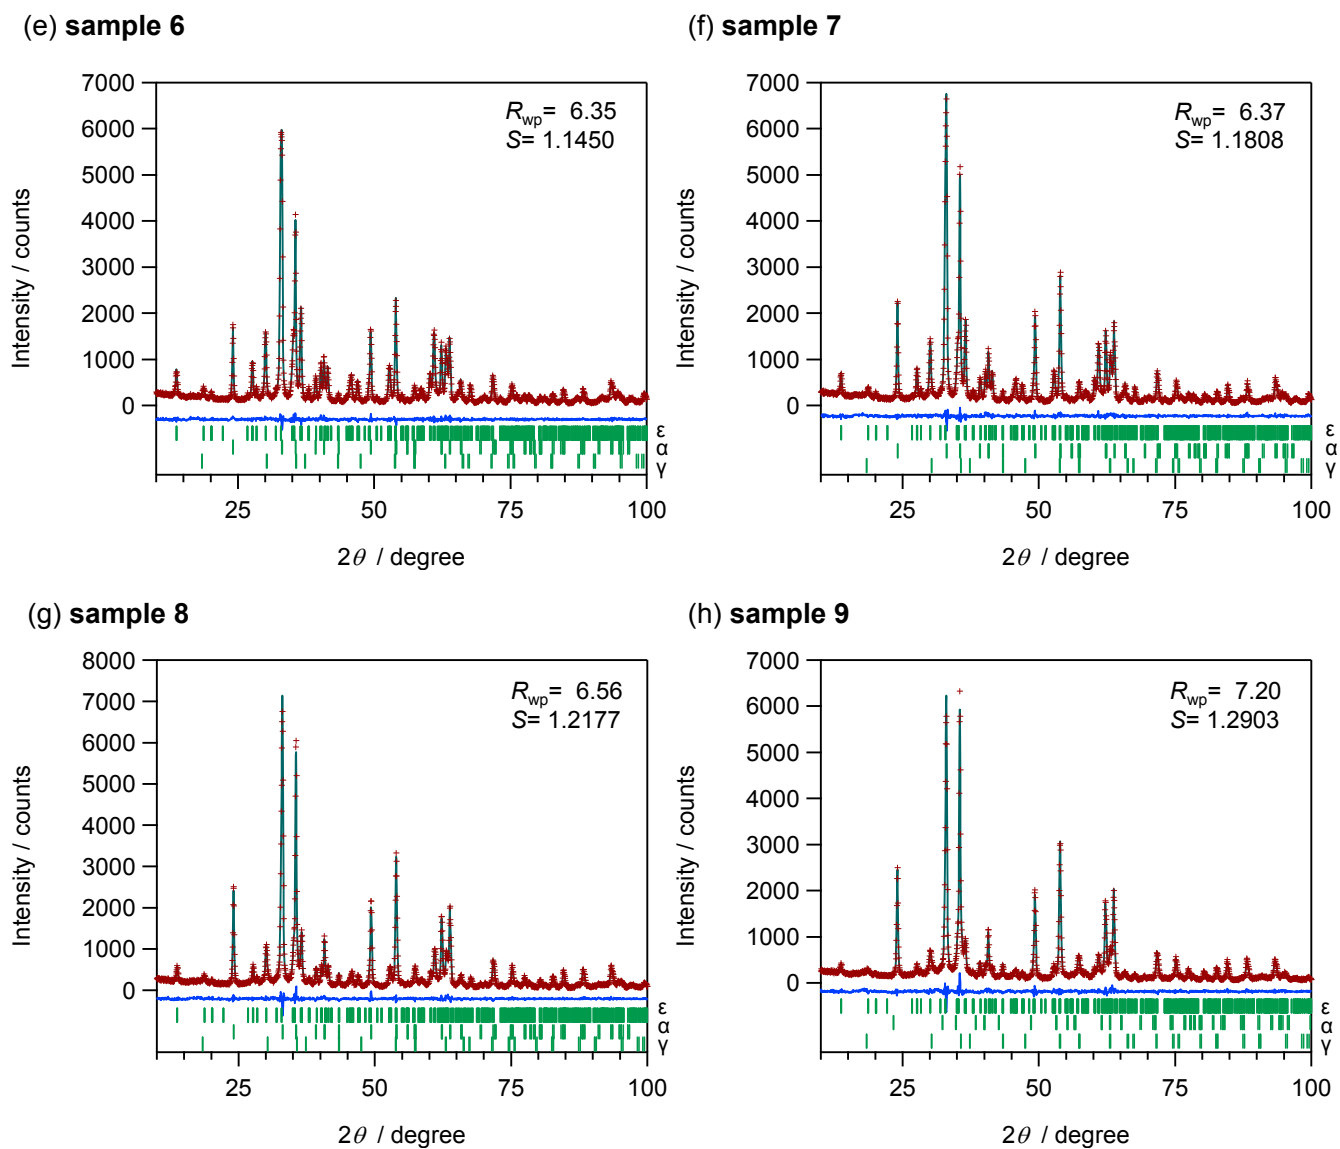

**Figure S4.** XRD patterns and Rietveld analyses for samples 6–9. Red dots, dark blue lines, and blue lines are the observed patterns, calculated patterns, and their differences, respectively. Green bars represent the calculated positions of the Bragg reflections for each phase.

## The synthesis and characterization of pure $\alpha$ -Rh<sub>x</sub>Fe<sub>2-x</sub>O<sub>3</sub> nanoparticles for crystal structure analysis

$\alpha$ -Rh<sub>x</sub>Fe<sub>2-x</sub>O<sub>3</sub> nanoparticles ( $x= 0, 0.12, 0.30,$  and  $0.36$ ) were prepared by sintering the precursors at  $1180\text{ }^\circ\text{C}$  ( $x= 0$ ),  $1160\text{ }^\circ\text{C}$  ( $x= 0.12$ ), and  $1140\text{ }^\circ\text{C}$  ( $x= 0.30, 0.36$ ) for 4 hours in air. The SiO<sub>2</sub> matrix was etched by stirring in a NaOH solution for 24 hours at  $60\text{ }^\circ\text{C}$ .

**Table S3.** Rhodium concentration in the synthesis and the observed concentration by ICP-MS measurement.

| Sample     |      | $x= 0$ | $x= 0.12$ | $x= 0.30$ | $x= 0.36$ |
|------------|------|--------|-----------|-----------|-----------|
| Rh/(Fe+Rh) | feed | 0.0    | 0.06      | 0.18      | 0.20      |
|            | obs. | 0.0    | 0.06      | 0.15      | 0.18      |

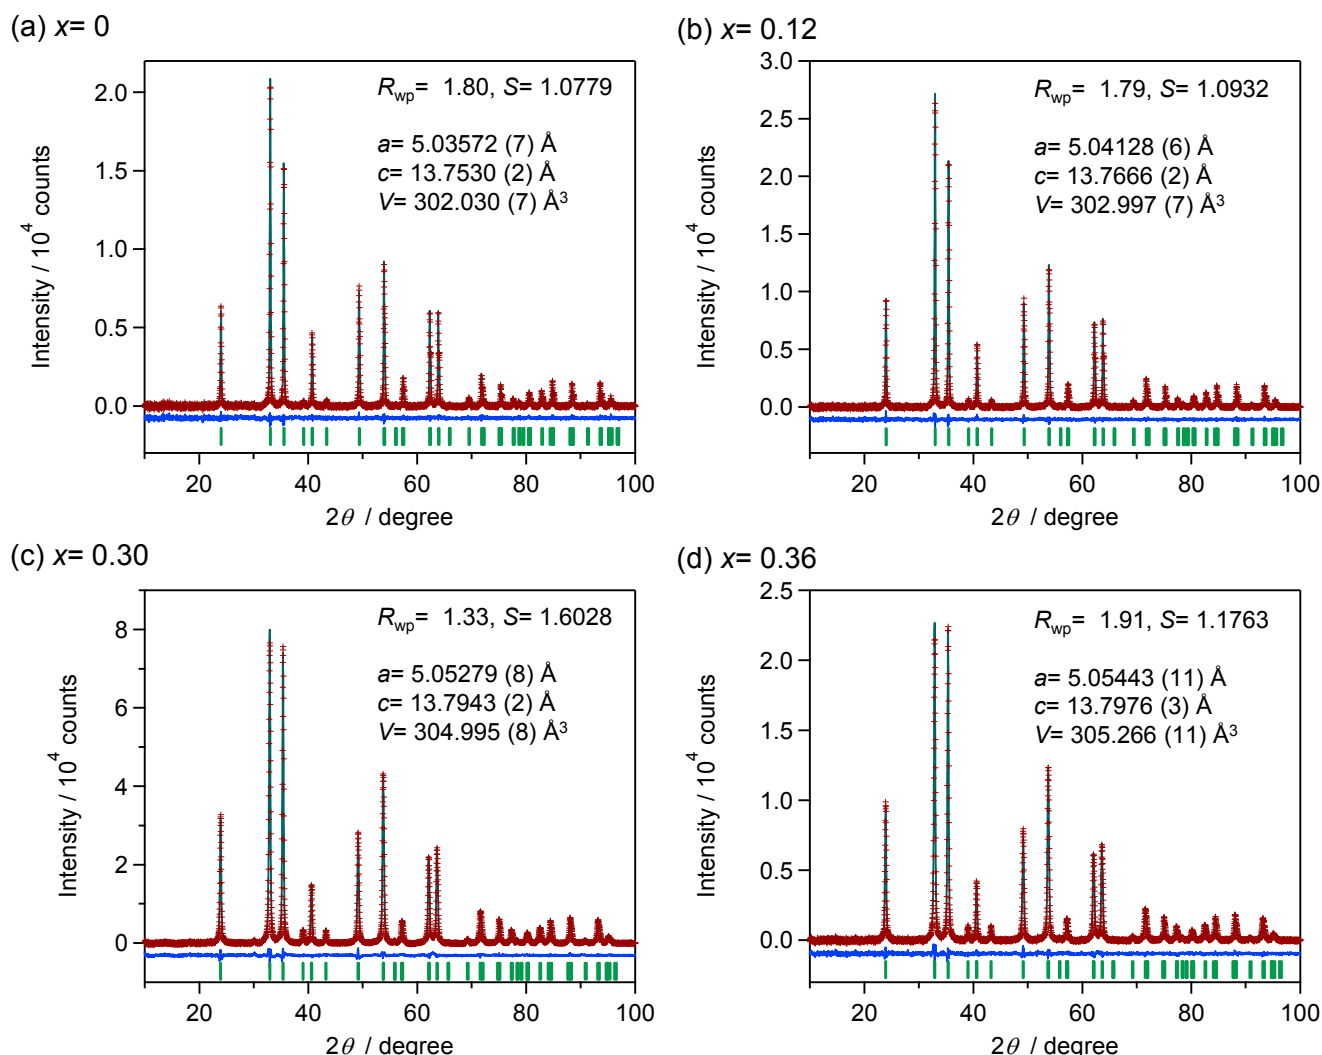

**Figure S5.** XRD patterns and Rietveld analyses for  $\alpha$ -Rh<sub>x</sub>Fe<sub>2-x</sub>O<sub>3</sub> ( $x= 0, 0.12, 0.30,$  and  $0.36$ ). Red dots, dark blue lines, and blue lines are the observed patterns, calculated patterns, and their differences, respectively. Green bars represent the calculated positions of the Bragg reflections.

$\alpha$ -Rh<sub>x</sub>Fe<sub>2-x</sub>O<sub>3</sub>

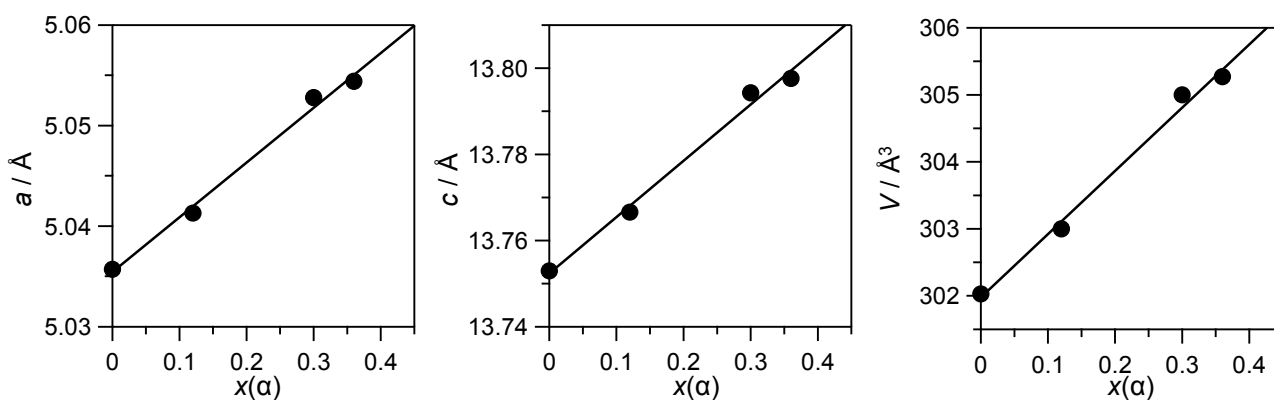

**Figure S6.** Lattice constants ( $a$ ,  $c$ ) and lattice volume ( $V$ ) versus  $x(\alpha)$  value plots for pure  $\alpha$ -Rh<sub>x</sub>Fe<sub>2-x</sub>O<sub>3</sub> samples ( $x=0, 0.12, 0.30$ , and  $0.36$ ).

$\epsilon$ -Rh<sub>x</sub>Fe<sub>2-x</sub>O<sub>3</sub>

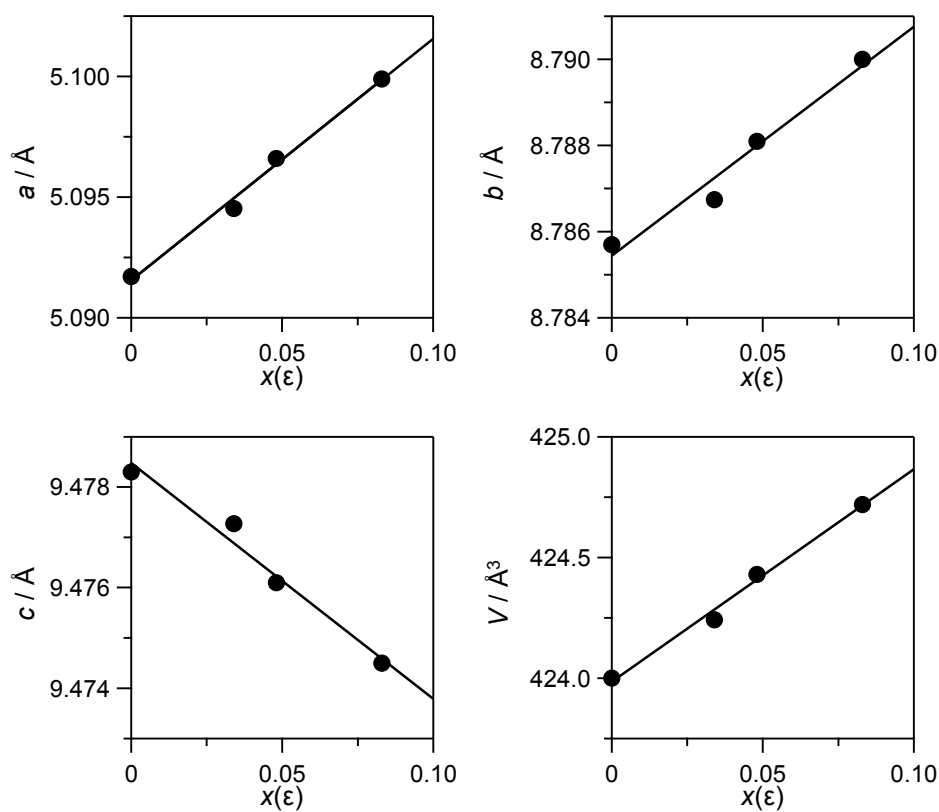

**Figure S7.** Lattice constants ( $a$ ,  $b$ ,  $c$ ) and lattice volume ( $V$ ) versus  $x(\epsilon)$  value plots for  $\epsilon$ -Rh<sub>x</sub>Fe<sub>2-x</sub>O<sub>3</sub> for samples 1, 2, 3, and 4.

**Table S4.** Crystal structure parameters of  $\epsilon$ -Rh<sub>x</sub>Fe<sub>2-x</sub>O<sub>3</sub> for samples 1–5 refined by Rietveld analyses of the XRD patterns.

| Sample               |     | 1                                          | 2                                                                | 3                                                                | 4                                                                | 5                                                                |
|----------------------|-----|--------------------------------------------|------------------------------------------------------------------|------------------------------------------------------------------|------------------------------------------------------------------|------------------------------------------------------------------|
|                      |     | $\epsilon$ -Fe <sub>2</sub> O <sub>3</sub> | $\epsilon$ -Rh <sub>0.03</sub> Fe <sub>1.97</sub> O <sub>3</sub> | $\epsilon$ -Rh <sub>0.05</sub> Fe <sub>1.95</sub> O <sub>3</sub> | $\epsilon$ -Rh <sub>0.08</sub> Fe <sub>1.92</sub> O <sub>3</sub> | $\epsilon$ -Rh <sub>0.10</sub> Fe <sub>1.90</sub> O <sub>3</sub> |
| $W_{\epsilon}$ / wt% |     | 64                                         | 68                                                               | 67                                                               | 64                                                               | 64                                                               |
| $a$ / Å              |     | 5.0917 (3)                                 | 5.0945 (3)                                                       | 5.0966 (3)                                                       | 5.0999 (3)                                                       | 5.1020 (3)                                                       |
| $b$ / Å              |     | 8.7857 (5)                                 | 8.7867 (5)                                                       | 8.7881 (5)                                                       | 8.7900 (5)                                                       | 8.7906 (5)                                                       |
| $c$ / Å              |     | 9.4783 (7)                                 | 9.4773 (7)                                                       | 9.4761 (8)                                                       | 9.4745 (7)                                                       | 9.4735 (8)                                                       |
| $V$ / Å <sup>3</sup> |     | 424.00 (5)                                 | 424.24 (5)                                                       | 424.43 (5)                                                       | 424.72 (5)                                                       | 424.88 (5)                                                       |
| Rh occupancy /%      | A   | 0                                          | 0                                                                | 0                                                                | 0                                                                | 0                                                                |
|                      | B   | 0                                          | 0 (0)                                                            | 0 (0)                                                            | 0 (0)                                                            | 0 (0)                                                            |
|                      | C   | 0                                          | 6 (0)                                                            | 11 (0)                                                           | 17 (0)                                                           | 21 (0)                                                           |
|                      | D   | 0                                          | 0                                                                | 0                                                                | 0                                                                | 0                                                                |
| Fe <sub>A</sub>      | $x$ | 0.315 (2)                                  | 0.311 (2)                                                        | 0.314 (2)                                                        | 0.308 (2)                                                        | 0.312 (2)                                                        |
|                      | $y$ | 0.3465 (14)                                | 0.3471 (15)                                                      | 0.346 (2)                                                        | 0.3441 (9)                                                       | 0.347 (2)                                                        |
|                      | $z$ | 0.156 (2)                                  | 0.159 (2)                                                        | 0.156 (2)                                                        | 0.161 (2)                                                        | 0.157 (3)                                                        |
| Fe <sub>B</sub>      | $x$ | 0.3169 (11)                                | 0.3207 (10)                                                      | 0.3207 (12)                                                      | 0.3213 (12)                                                      | 0.3198 (12)                                                      |
|                      | $y$ | 0.0324 (5)                                 | 0.0328 (4)                                                       | 0.0324 (5)                                                       | 0.0324 (4)                                                       | 0.0318 (5)                                                       |
|                      | $z$ | 0.368 (2)                                  | 0.373 (2)                                                        | 0.371 (3)                                                        | 0.376 (2)                                                        | 0.372 (3)                                                        |
| Fe <sub>C</sub>      | $x$ | 0.3056 (11)                                | 0.3098 (9)                                                       | 0.3081 (10)                                                      | 0.3120 (9)                                                       | 0.3127 (9)                                                       |
|                      | $y$ | 0.6582 (6)                                 | 0.6579 (5)                                                       | 0.6595 (6)                                                       | 0.6589 (5)                                                       | 0.6592 (6)                                                       |
|                      | $z$ | 0.378 (3)                                  | 0.384 (2)                                                        | 0.380 (2)                                                        | 0.386 (2)                                                        | 0.382 (3)                                                        |
| Fe <sub>D</sub>      | $x$ | 0.192 (2)                                  | 0.190 (2)                                                        | 0.189 (2)                                                        | 0.184 (2)                                                        | 0.189 (2)                                                        |
|                      | $y$ | 0.8495 (13)                                | 0.8490 (13)                                                      | 0.8492 (14)                                                      | 0.8524 (8)                                                       | 0.849 (2)                                                        |
|                      | $z$ | 0.073 (2)                                  | 0.076 (2)                                                        | 0.074 (2)                                                        | 0.079 (2)                                                        | 0.074 (3)                                                        |
| O1                   | $x$ | 0.025 (5)                                  | 0.020 (5)                                                        | 0.025 (5)                                                        | 0.026 (5)                                                        | 0.029 (6)                                                        |
|                      | $y$ | 0.328 (2)                                  | 0.329 (2)                                                        | 0.332 (2)                                                        | 0.334 (2)                                                        | 0.328 (3)                                                        |
|                      | $z$ | 0                                          | 0                                                                | 0                                                                | 0                                                                | 0                                                                |
| O2                   | $x$ | 0.995 (5)                                  | 0.994 (4)                                                        | 0.994 (5)                                                        | 0.992 (5)                                                        | 0.993 (5)                                                        |
|                      | $y$ | 0.009 (2)                                  | 0.007 (2)                                                        | 0.009 (2)                                                        | 0.007 (2)                                                        | 0.007 (3)                                                        |
|                      | $z$ | 0.997 (6)                                  | 1.005 (6)                                                        | 0.999 (6)                                                        | 1.009 (5)                                                        | 1.008 (6)                                                        |
| O3                   | $x$ | 0.027 (5)                                  | 0.023 (5)                                                        | 0.024 (5)                                                        | 0.016 (6)                                                        | 0.021 (6)                                                        |
|                      | $y$ | 0.665 (2)                                  | 0.670 (2)                                                        | 0.667 (2)                                                        | 0.669 (2)                                                        | 0.667 (3)                                                        |
|                      | $z$ | 0.013 (3)                                  | 0.019 (3)                                                        | 0.016 (3)                                                        | 0.020 (3)                                                        | 0.015 (3)                                                        |
| O4                   | $x$ | 0.149 (5)                                  | 0.151 (4)                                                        | 0.149 (5)                                                        | 0.154 (5)                                                        | 0.146 (5)                                                        |
|                      | $y$ | 0.494 (2)                                  | 0.494 (2)                                                        | 0.494 (2)                                                        | 0.492 (2)                                                        | 0.494 (2)                                                        |
|                      | $z$ | 0.270 (3)                                  | 0.275 (2)                                                        | 0.273 (3)                                                        | 0.277 (2)                                                        | 0.273 (3)                                                        |
| O5                   | $x$ | 0.152 (5)                                  | 0.155 (5)                                                        | 0.154 (6)                                                        | 0.148 (5)                                                        | 0.155 (6)                                                        |
|                      | $y$ | 0.839 (3)                                  | 0.837 (2)                                                        | 0.835 (3)                                                        | 0.838 (3)                                                        | 0.841 (3)                                                        |
|                      | $z$ | 0.271 (2)                                  | 0.274 (2)                                                        | 0.274 (2)                                                        | 0.275 (2)                                                        | 0.272 (3)                                                        |
| O6                   | $x$ | 0.155 (6)                                  | 0.153 (6)                                                        | 0.160 (7)                                                        | 0.157 (6)                                                        | 0.158 (7)                                                        |
|                      | $y$ | 0.172 (3)                                  | 0.174 (3)                                                        | 0.174 (3)                                                        | 0.173 (3)                                                        | 0.172 (3)                                                        |
|                      | $z$ | 0.242 (3)                                  | 0.247 (2)                                                        | 0.246 (3)                                                        | 0.249 (2)                                                        | 0.247 (3)                                                        |



**Table S5.** Crystal structure parameters of  $\epsilon$ -Rh<sub>x</sub>Fe<sub>2-x</sub>O<sub>3</sub> for samples **6–9** refined by Rietveld analyses of the XRD patterns.

|                      |     | <b>6</b>                                                         | <b>7</b>                                                         | <b>8</b>                                                         | <b>9</b>                                                         |
|----------------------|-----|------------------------------------------------------------------|------------------------------------------------------------------|------------------------------------------------------------------|------------------------------------------------------------------|
|                      |     | $\epsilon$ -Rh <sub>0.14</sub> Fe <sub>1.86</sub> O <sub>3</sub> | $\epsilon$ -Rh <sub>0.15</sub> Fe <sub>1.85</sub> O <sub>3</sub> | $\epsilon$ -Rh <sub>0.18</sub> Fe <sub>1.82</sub> O <sub>3</sub> | $\epsilon$ -Rh <sub>0.19</sub> Fe <sub>1.81</sub> O <sub>3</sub> |
| $W_{\epsilon}$ / wt% |     | 59                                                               | 49                                                               | 37                                                               | 24                                                               |
| $a$ / Å              |     | 5.1055 (3)                                                       | 5.1067 (4)                                                       | 5.1095 (5)                                                       | 5.1110 (9)                                                       |
| $b$ / Å              |     | 8.7941 (6)                                                       | 8.7932 (7)                                                       | 8.7951 (9)                                                       | 8.798 (2)                                                        |
| $c$ / Å              |     | 9.4734 (9)                                                       | 9.4699 (11)                                                      | 9.471 (2)                                                        | 9.472 (3)                                                        |
| $V$ / Å <sup>3</sup> |     | 425.34 (6)                                                       | 425.24 (7)                                                       | 425.59 (10)                                                      | 425.9 (2)                                                        |
| Rh occupancy         | A   | 0 (1)                                                            | 0 (1)                                                            | 2 (2)                                                            | 3 (3)                                                            |
|                      | B   | 2 (1)                                                            | 2 (1)                                                            | 2 (3)                                                            | 5 (4)                                                            |
|                      | C   | 26 (1)                                                           | 29 (1)                                                           | 32 (2)                                                           | 31 (3)                                                           |
|                      | D   | 0                                                                | 0                                                                | 0                                                                | 0                                                                |
| Fe <sub>A</sub>      | $x$ | 0.313 (3)                                                        | 0.319 (3)                                                        | 0.311 (4)                                                        | 0.316 (7)                                                        |
|                      | $y$ | 0.3429 (11)                                                      | 0.351 (2)                                                        | 0.3379 (15)                                                      | 0.338 (3)                                                        |
|                      | $z$ | 0.161 (2)                                                        | 0.168 (3)                                                        | 0.165 (4)                                                        | 0.158 (9)                                                        |
| Fe <sub>B</sub>      | $x$ | 0.3244 (13)                                                      | 0.324 (2)                                                        | 0.325 (3)                                                        | 0.321 (5)                                                        |
|                      | $y$ | 0.0316 (5)                                                       | 0.0321 (7)                                                       | 0.0308 (10)                                                      | 0.028 (2)                                                        |
|                      | $z$ | 0.377 (3)                                                        | 0.381 (3)                                                        | 0.381 (5)                                                        | 0.374 (10)                                                       |
| Fe <sub>C</sub>      | $x$ | 0.3144 (10)                                                      | 0.3129 (12)                                                      | 0.318 (2)                                                        | 0.319 (3)                                                        |
|                      | $y$ | 0.6580 (6)                                                       | 0.6598 (9)                                                       | 0.6573 (13)                                                      | 0.656 (2)                                                        |
|                      | $z$ | 0.386 (2)                                                        | 0.394 (3)                                                        | 0.388 (4)                                                        | 0.381 (9)                                                        |
| Fe <sub>D</sub>      | $x$ | 0.191 (2)                                                        | 0.195 (2)                                                        | 0.196 (4)                                                        | 0.205 (5)                                                        |
|                      | $y$ | 0.8520 (10)                                                      | 0.842 (2)                                                        | 0.8546 (13)                                                      | 0.858 (2)                                                        |
|                      | $z$ | 0.077 (3)                                                        | 0.085 (3)                                                        | 0.078 (4)                                                        | 0.066 (10)                                                       |
| O1                   | $x$ | 0.021 (7)                                                        | 0.019 (10)                                                       | 0.023 (12)                                                       | 0.05 (2)                                                         |
|                      | $y$ | 0.327 (3)                                                        | 0.332 (5)                                                        | 0.328 (5)                                                        | 0.318 (9)                                                        |
|                      | $z$ | 0                                                                | 0                                                                | 0                                                                | 0                                                                |
| O2                   | $x$ | 0.988 (6)                                                        | 0.997 (8)                                                        | 0.978 (10)                                                       | 0.98 (2)                                                         |
|                      | $y$ | 0.006 (3)                                                        | 0.006 (4)                                                        | 0.006 (4)                                                        | 0.005 (8)                                                        |
|                      | $z$ | 1.008 (6)                                                        | 1.019 (7)                                                        | 1.013 (9)                                                        | 1.01 (2)                                                         |
| O3                   | $x$ | 0.019 (7)                                                        | 0.008 (10)                                                       | 0.004 (12)                                                       | 0.01 (2)                                                         |
|                      | $y$ | 0.670 (3)                                                        | 0.671 (5)                                                        | 0.664 (5)                                                        | 0.655 (9)                                                        |
|                      | $z$ | 0.026 (4)                                                        | 0.028 (4)                                                        | 0.029 (7)                                                        | 0.017 (14)                                                       |
| O4                   | $x$ | 0.161 (6)                                                        | 0.158 (8)                                                        | 0.165 (12)                                                       | 0.15 (2)                                                         |
|                      | $y$ | 0.490 (3)                                                        | 0.490 (3)                                                        | 0.496 (5)                                                        | 0.498 (10)                                                       |
|                      | $z$ | 0.277 (3)                                                        | 0.283 (3)                                                        | 0.286 (5)                                                        | 0.282 (10)                                                       |
| O5                   | $x$ | 0.156 (7)                                                        | 0.163 (9)                                                        | 0.151 (11)                                                       | 0.15 (2)                                                         |
|                      | $y$ | 0.836 (4)                                                        | 0.838 (5)                                                        | 0.841 (8)                                                        | 0.830 (12)                                                       |
|                      | $z$ | 0.277 (3)                                                        | 0.282 (3)                                                        | 0.277 (5)                                                        | 0.267 (10)                                                       |
| O6                   | $x$ | 0.158 (7)                                                        | 0.157 (10)                                                       | 0.160 (13)                                                       | 0.16 (2)                                                         |
|                      | $y$ | 0.168 (4)                                                        | 0.171 (4)                                                        | 0.166 (8)                                                        | 0.153 (13)                                                       |
|                      | $z$ | 0.250 (3)                                                        | 0.260 (3)                                                        | 0.267 (5)                                                        | 0.278 (11)                                                       |

**Table S6.** Crystal structure parameters of  $\alpha\text{-Rh}_x\text{Fe}_{2-x}\text{O}_3$  for each sample refined by Rietveld analyses of the XRD patterns.

| sample               |     | 1                              | 2                                                   | 3                                                   | 4                                                   | 5                                                   |
|----------------------|-----|--------------------------------|-----------------------------------------------------|-----------------------------------------------------|-----------------------------------------------------|-----------------------------------------------------|
|                      |     | $\alpha\text{-Fe}_2\text{O}_3$ | $\alpha\text{-Rh}_{0.05}\text{Fe}_{1.95}\text{O}_3$ | $\alpha\text{-Rh}_{0.12}\text{Fe}_{1.88}\text{O}_3$ | $\alpha\text{-Rh}_{0.16}\text{Fe}_{1.84}\text{O}_3$ | $\alpha\text{-Rh}_{0.20}\text{Fe}_{1.80}\text{O}_3$ |
| $W_a$ / wt%          |     | 36                             | 32                                                  | 33                                                  | 36                                                  | 34                                                  |
| $a$ / Å              |     | 5.0365 (3)                     | 5.0379 (4)                                          | 5.0413 (3)                                          | 5.0437 (3)                                          | 5.0457 (3)                                          |
| $c$ / Å              |     | 13.7554 (9)                    | 13.7589 (9)                                         | 13.7668 (9)                                         | 13.7729 (8)                                         | 13.7762 (9)                                         |
| $V$ / Å <sup>3</sup> |     | 302.18 (4)                     | 302.43 (4)                                          | 303.01 (4)                                          | 303.43 (3)                                          | 303.74 (3)                                          |
| Fe/Rh                | $x$ | 0                              | 0                                                   | 0                                                   | 0                                                   | 0                                                   |
|                      | $y$ | 0                              | 0                                                   | 0                                                   | 0                                                   | 0                                                   |
|                      | $z$ | 0.14493 (10)                   | 0.14544 (10)                                        | 0.14600 (10)                                        | 0.14651 (9)                                         | 0.14705 (11)                                        |
| O                    | $x$ | 0.3084 (9)                     | 0.3088 (9)                                          | 0.3088 (10)                                         | 0.3093 (9)                                          | 0.3071 (10)                                         |
|                      | $y$ | 0                              | 0                                                   | 0                                                   | 0                                                   | 0                                                   |
|                      | $z$ | 1/4                            | 1/4                                                 | 1/4                                                 | 1/4                                                 | 1/4                                                 |

| sample               |     | 6                                                   | 7                                                   | 8                                                   | 9                                                   |
|----------------------|-----|-----------------------------------------------------|-----------------------------------------------------|-----------------------------------------------------|-----------------------------------------------------|
|                      |     | $\alpha\text{-Rh}_{0.26}\text{Fe}_{1.74}\text{O}_3$ | $\alpha\text{-Rh}_{0.28}\text{Fe}_{1.72}\text{O}_3$ | $\alpha\text{-Rh}_{0.35}\text{Fe}_{1.65}\text{O}_3$ | $\alpha\text{-Rh}_{0.38}\text{Fe}_{1.62}\text{O}_3$ |
| $W_a$ / wt%          |     | 38                                                  | 47                                                  | 54                                                  | 60                                                  |
| $a$ / Å              |     | 5.0493 (3)                                          | 5.0503 (3)                                          | 5.0540 (3)                                          | 5.0559 (3)                                          |
| $c$ / Å              |     | 13.7862 (9)                                         | 13.7868 (8)                                         | 13.7959 (8)                                         | 13.8008 (10)                                        |
| $V$ / Å <sup>3</sup> |     | 304.39 (3)                                          | 304.53 (3)                                          | 305.18 (3)                                          | 305.52 (3)                                          |
| Fe/Rh                | $x$ | 0                                                   | 0                                                   | 0                                                   | 0                                                   |
|                      | $y$ | 0                                                   | 0                                                   | 0                                                   | 0                                                   |
|                      | $z$ | 0.14763 (9)                                         | 0.14786 (9)                                         | 0.14853 (8)                                         | 0.14860 (10)                                        |
| O                    | $x$ | 0.3128 (9)                                          | 0.3076 (8)                                          | 0.3128 (9)                                          | 0.3071 (9)                                          |
|                      | $y$ | 0                                                   | 0                                                   | 0                                                   | 0                                                   |
|                      | $z$ | 1/4                                                 | 1/4                                                 | 1/4                                                 | 1/4                                                 |

**Table S7.** Crystal structure parameters of  $\gamma\text{-Rh}_x\text{Fe}_{2-x}\text{O}_3$  for each sample refined by Rietveld analyses of the XRD patterns.

| sample               |     | <b>5</b>                                          | <b>6</b>                                          | <b>7</b>                                          | <b>8</b>                                          | <b>9</b>                                          |
|----------------------|-----|---------------------------------------------------|---------------------------------------------------|---------------------------------------------------|---------------------------------------------------|---------------------------------------------------|
|                      |     | $\gamma\text{-Rh}_{0.5}\text{Fe}_{1.5}\text{O}_3$ | $\gamma\text{-Rh}_{0.4}\text{Fe}_{1.6}\text{O}_3$ | $\gamma\text{-Rh}_{0.4}\text{Fe}_{1.6}\text{O}_3$ | $\gamma\text{-Rh}_{0.3}\text{Fe}_{1.7}\text{O}_3$ | $\gamma\text{-Rh}_{0.3}\text{Fe}_{1.7}\text{O}_3$ |
| $W_r$ / wt%          |     | 1                                                 | 3                                                 | 5                                                 | 8                                                 | 15                                                |
| $a$ / Å              |     | 8.35 (2)                                          | 8.349 (8)                                         | 8.343 (5)                                         | 8.347 (4)                                         | 8.343 (6)                                         |
| $V$ / Å <sup>3</sup> |     | 582 (2)                                           | 582.0 (9)                                         | 580.7 (6)                                         | 581.5 (5)                                         | 580.6 (7)                                         |
| Fe <sub>A</sub>      | $x$ | 0                                                 | 0                                                 | 0                                                 | 0                                                 | 0                                                 |
|                      | $y$ | 0                                                 | 0                                                 | 0                                                 | 0                                                 | 0                                                 |
|                      | $z$ | 0                                                 | 0                                                 | 0                                                 | 0                                                 | 0                                                 |
| Fe <sub>B</sub>      | $x$ | 5/8                                               | 5/8                                               | 5/8                                               | 5/8                                               | 5/8                                               |
|                      | $y$ | 5/8                                               | 5/8                                               | 5/8                                               | 5/8                                               | 5/8                                               |
|                      | $z$ | 5/8                                               | 5/8                                               | 5/8                                               | 5/8                                               | 5/8                                               |
| O                    | $x$ | 3/8                                               | 3/8                                               | 3/8                                               | 3/8                                               | 3/8                                               |
|                      | $y$ | 3/8                                               | 3/8                                               | 3/8                                               | 3/8                                               | 3/8                                               |
|                      | $z$ | 3/8                                               | 3/8                                               | 3/8                                               | 3/8                                               | 3/8                                               |

## § 5. Magnetic properties

### FCM curves

To investigate the magnetic properties of  $\epsilon$ -phase excluding the contribution of  $\alpha$ - and  $\gamma$ -phases, the FCM curves were calibrated by using the observed curve of pure  $\alpha$ - $\text{Rh}_x\text{Fe}_{2-x}\text{O}_3$  and the estimated curves of  $\gamma$ - $\text{Rh}_x\text{Fe}_{2-x}\text{O}_3$  based on Bloch law.

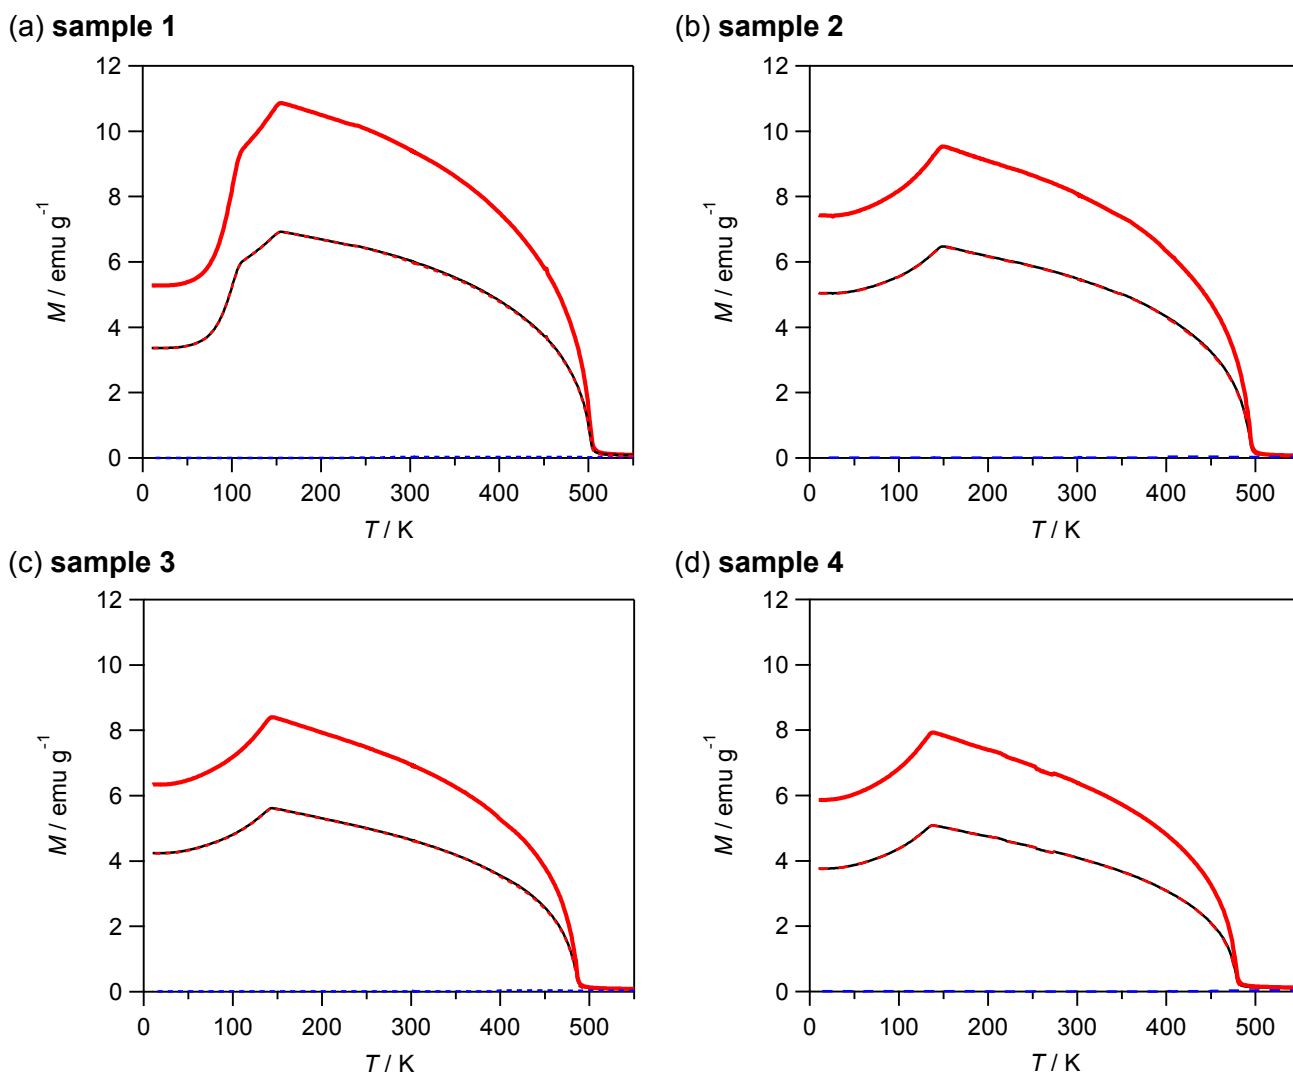

**Figure S8.** Measured and calibrated FCM curves in an external field of 1 kOe for samples 1–4. Black lines indicate the measured curves, whereas dotted red, blue, and gray lines represent the estimated components of  $\epsilon$ -phase,  $\alpha$ -phase, and  $\gamma$ -phase, respectively. The bold red lines represent the calibrated curves for  $\epsilon$ - $\text{Rh}_x\text{Fe}_{2-x}\text{O}_3$ .

(e) sample 5

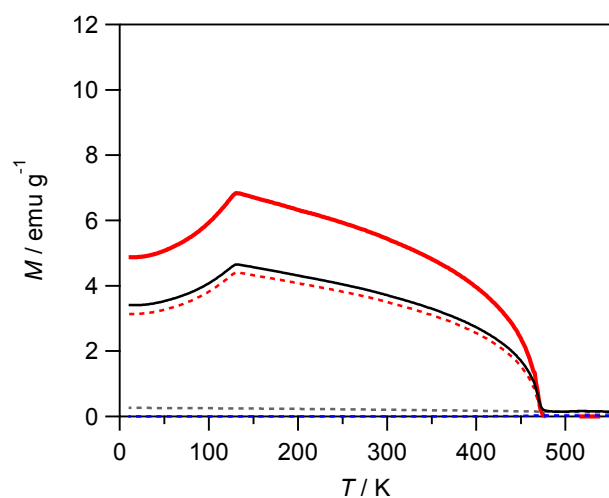

(f) sample 6

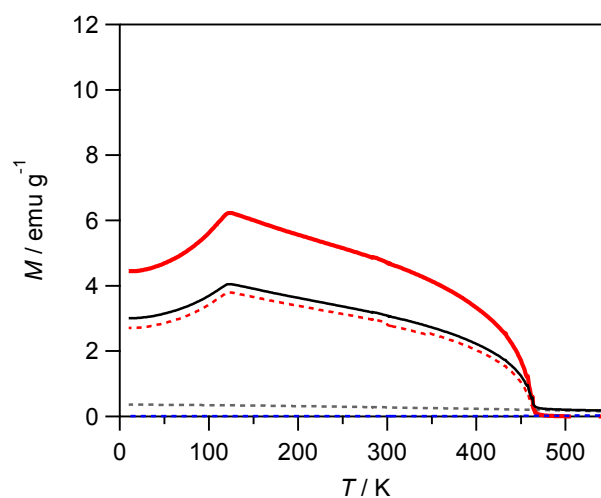

(g) sample 7

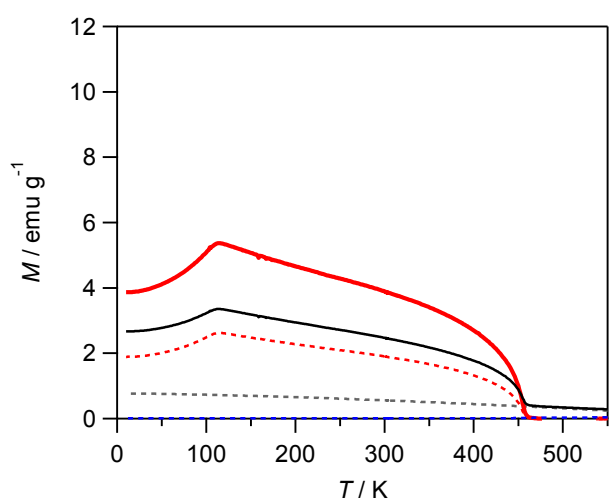

(h) sample 8

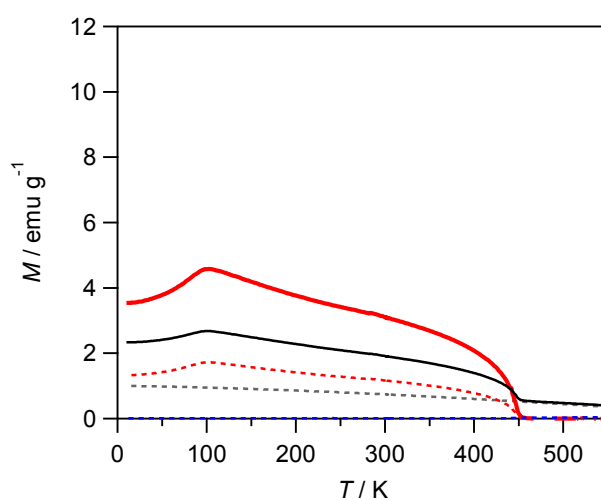

(i) sample 9

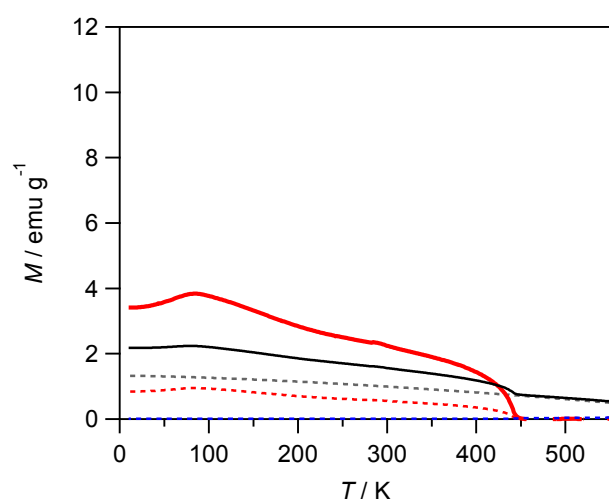

**Figure S9.** Measured and calibrated FCM curves in an external field of 1 kOe for samples 5–9. Black lines indicate the measured curves, whereas dotted red, blue, and gray lines represent the estimated components of  $\epsilon$ -phase,  $\alpha$ -phase, and  $\gamma$ -phase, respectively. The bold red lines represent the calibrated curves for  $\epsilon\text{-Rh}_x\text{Fe}_{2-x}\text{O}_3$ .

## *M-H* curves

To investigate the magnetic properties of  $\epsilon$ -phase excluding the contribution of  $\alpha$ - and  $\gamma$ -phases, the *M-H* curves were calibrated by using the observed curve of pure  $\alpha$ - $\text{Rh}_x\text{Fe}_{2-x}\text{O}_3$  and the estimated curves of  $\gamma$ - $\text{Rh}_x\text{Fe}_{2-x}\text{O}_3$  based on Langevin function.

(a) sample 2

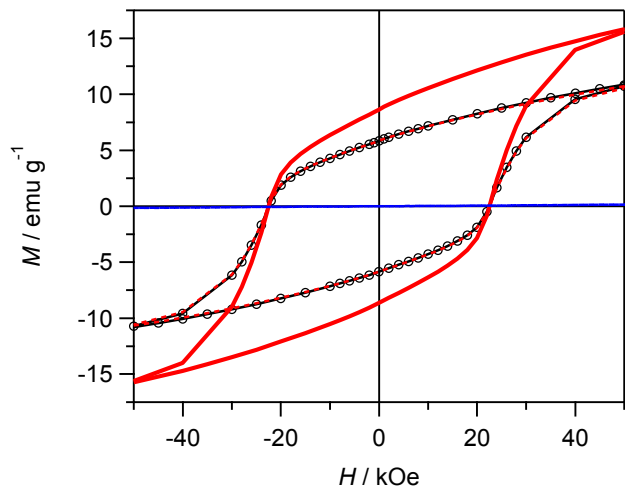

(b) sample 4

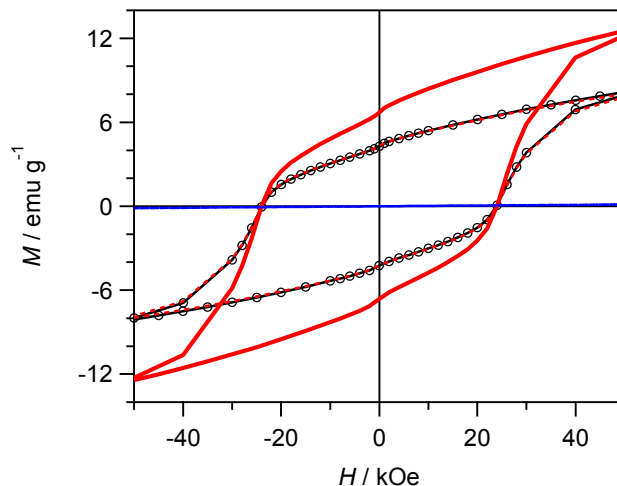

(c) sample 6

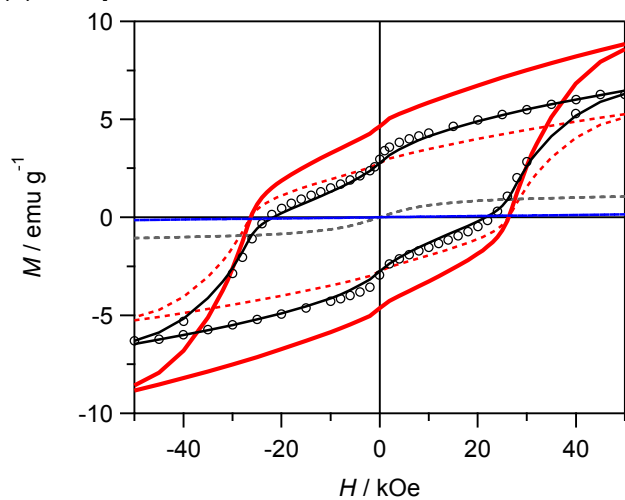

(d) sample 8

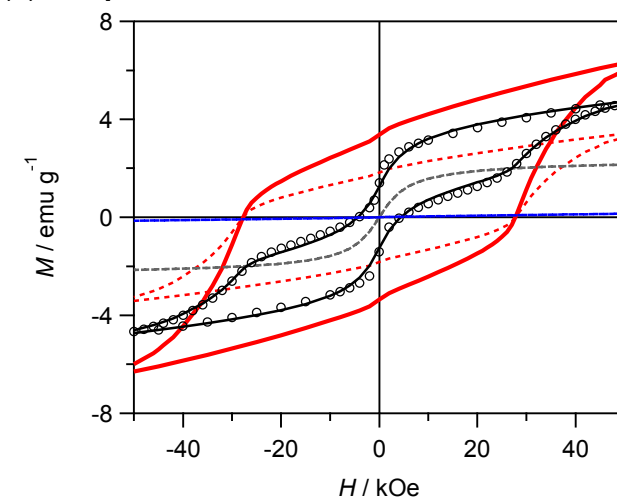

**Figure S10.** Magnetization *versus* external magnetic field curves at 300 K for samples 2, 4, 6 and 8. Open circle is the observed value. Dotted lines represent contributions from each phase (red, blue, and gray dotted lines represent the  $\epsilon$ -,  $\alpha$ -, and  $\gamma$ -phases, respectively). Black solid line is their sum. Red solid line denotes the estimated value for a single-phase  $\epsilon$ - $\text{Rh}_x\text{Fe}_{2-x}\text{O}_3$ .
